# Supplementary material for: SIRT1 Alleviates LPS-Induced IL-1β Production by Suppressing NLRP3 Inflammasome Activation and ROS Production in Trophoblasts
Source: PubMed Central journal article supplement (PMC7140679; doi:10.3390/cells9030728), 2020-03-16
Supplement: cells-09-00728-s001.pdf [file cells-09-00728-s001.pdf]

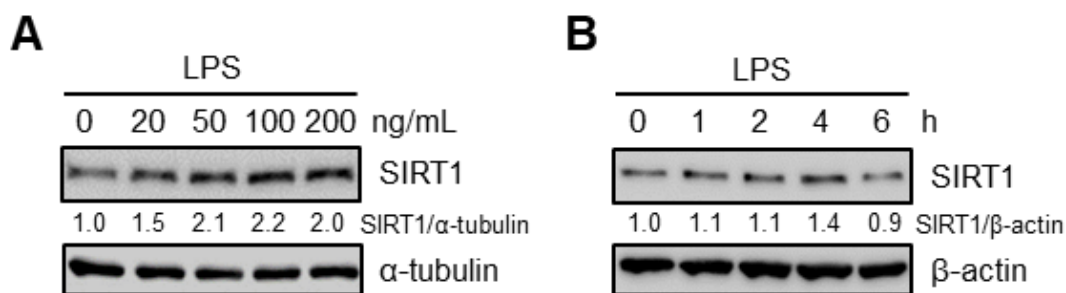

**Figure S1.** Expression of SIRT1 in HTR-8/SVneo cells exposed to LPS. **(A)** HTR-8/SVneo cells were treated with the indicated concentration of LPS for 4 h. Cell lysates were immunoblotted with an anti-SIRT1 antibody.  $\alpha$ -Tubulin served as the loading control. Band intensities were quantified and normalized to the  $\alpha$ -tubulin levels. **(B)** HTR-8/SVneo cells were treated with 200 ng/mL LPS for the indicated time. Cell lysates were immunoblotted with an anti-SIRT1 antibody.  $\beta$ -Actin served as the loading control. Numbers below the immunoblot bands indicate the fold changes normalized to the  $\beta$ -actin bands.

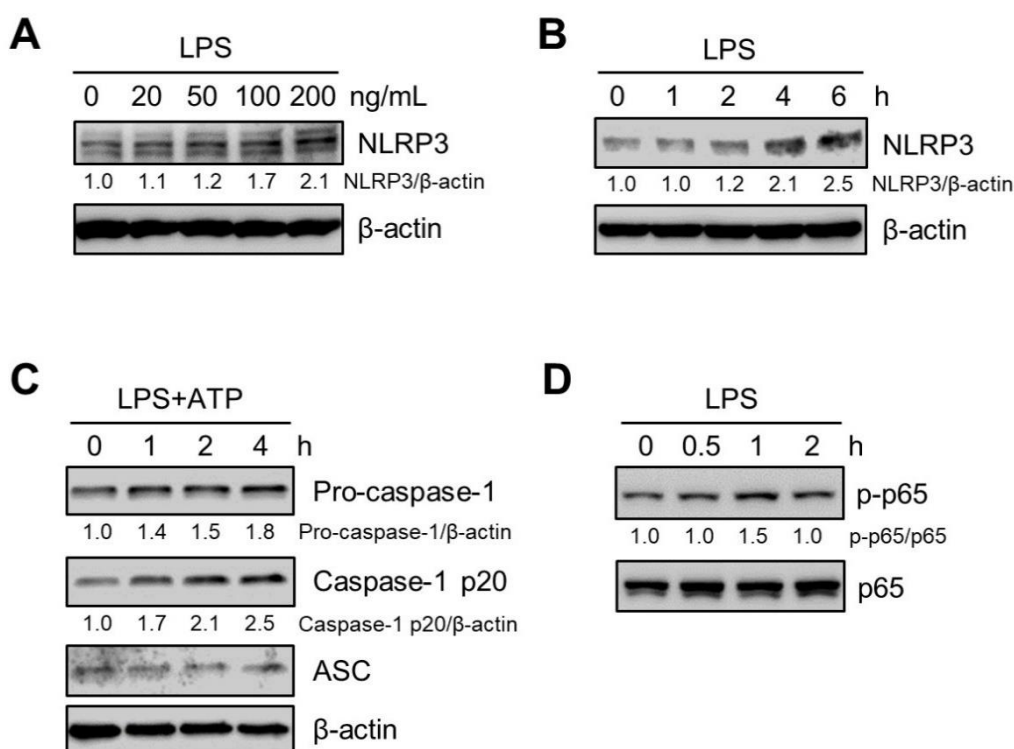

**Figure S2.** NLRP3 inflammasome activation in HTR-8/SVneo cells exposed to LPS. **(A)** HTR-8/SVneo cells were treated with the indicated concentration of LPS for 4 h. Cell lysates were immunoblotted with an anti-NLRP3 antibody.  $\beta$ -Actin served as the loading control. Numbers below the immunoblot bands indicate the fold changes normalized to the  $\beta$ -actin bands. **(B,D)** HTR-8/SVneo cells were treated with 200 ng/mL LPS for the indicated time. Cell lysates were immunoblotted with an anti-NLRP3, anti-p-p65 NF- $\kappa$ B, and anti-p65 NF- $\kappa$ B antibodies. **(C)** HTR-8/SVneo cells were treated with 200 ng/mL LPS for the indicated time and then followed by ATP (5 mM) treatment for 45 min. Cell lysates were immunoblotted with anti-Caspase-1 and anti-ASC antibodies.  $\beta$ -Actin or p65 served as the loading control. Numbers below the immunoblot bands indicate the fold changes normalized to the control bands.

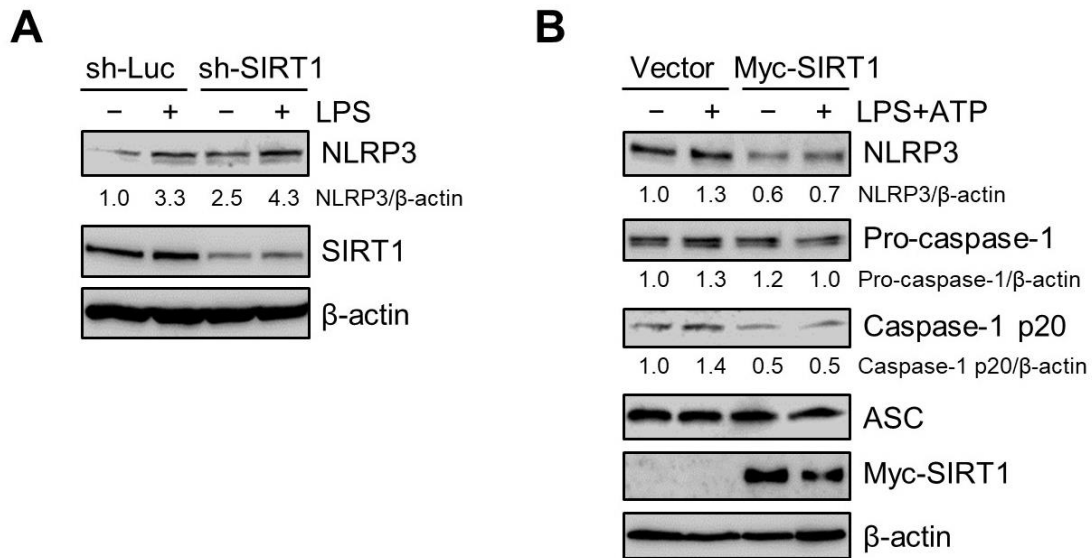

**Figure S3.** SIRT1 inhibits LPS-induced NLRP3 inflammasome activation (A) HTR-8/SVneo cells were infected with lentiviruses expressing shRNAs targeting luciferase (sh-Luc) or SIRT1 (sh-SIRT1) and then treated with 200 ng/mL LPS for 10 h. Cell lysates were immunoblotted with anti-NLRP3 and anti-SIRT1 antibodies. (B) Sw.71 cells were transfected with pcDNA3-myc-SIRT1 or pcDNA3 (empty vector) and treated with LPS (100 ng/mL) for 24 h and then followed by ATP (5 mM) treatment for 45 min, or were treated with vehicle. Cell lysates were immunoblotted with anti-NLRP3, anti-Caspase-1, anti-ASC, and anti-myc antibodies.  $\beta$ -Actin served as the loading control. Numbers below the immunoblot bands indicate fold changes normalized to the  $\beta$ -actin bands.

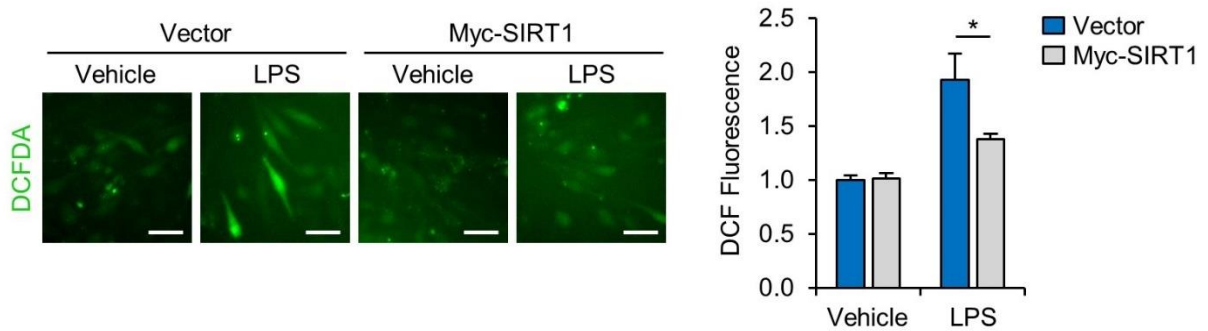

**Figure S4.** SIRT1 overexpression suppresses LPS-induced oxidative stress in Sw.71 cells. Sw.71 cells were transfected with pcDNA3-myc-SIRT1 or pcDNA3 (empty vector) and then treated with LPS (100 ng/mL) for 6 h. Reactive oxygen species (ROS) levels were analyzed using CM-H<sub>2</sub>DCFDA. Scale bars, 50  $\mu$ m. Data are indicated as mean  $\pm$  SEM. Results are representative of at least three independent experiments. \*  $p < 0.05$  (Student's *t*-test).
